# Supplementary material
Source: MDPI journal article supplement (https://www.mdpi.com/search?q=sustainability-12-02535)
Supplement: s001 [file sustainability-12-02535-s001.pdf]

**Supplementary Table S1.** The list of WDF from six main host tree genera in previous literature and current study

| <b>Gymnosperm</b>              |      |                                          |         |                                            |         |
|--------------------------------|------|------------------------------------------|---------|--------------------------------------------|---------|
| <i>Abies</i> spp.              | Site | <i>Larix</i> spp.                        | Site    | <i>Pinus</i> spp.                          | Site    |
| <i>Aleurodiscus amorphus</i>   | 2, 3 | <i>Amphinema byssoides</i>               | 1, 2    | <i>Acanthobasidium lividocoeruleum</i>     | 3       |
| <i>Antrodia hingganensis</i>   | 5    | <i>Amyloporia xantha</i>                 | 2       | <i>Alutaceodontia alutacea</i>             | 1       |
| <i>Antrodia xantha</i>         | 5    | <i>Amylostereum chailletii</i>           | 1, 2    | <i>Amphinema byssoides</i>                 | 1       |
| <i>Aphanobasidium</i> sp.      | 3    | <i>Antrodia sinuosa</i>                  | 2       | <i>Amylocorticium subsulphureum</i>        | 3       |
| <i>Coniophora puteana</i>      | 4, 5 | <i>Aphanobasidium pseudotsugae</i>       | 2       | <i>Amyloporia xantha</i>                   | 1       |
| <i>Fibroporia gossypium</i>    | 5    | <i>Athelia decipiens</i>                 | 2       | <i>Antrodia ramentacea</i>                 | 2       |
| <i>Fomitopsis pinicola</i>     | 4, 5 | <i>Botryobasidium botryoideum</i>        | 2       | <i>Antrodia serialis</i>                   | 1       |
| <i>Gloiothele</i> sp.          | 5    | <i>Chaetoderma luna</i>                  | 2       | <i>Antrodia sinuosa</i>                    | 1, 2, 3 |
| <i>Hapalopilus rutilans</i>    | 4, 5 | <i>Clavariadelphus ligula</i>            | 2       | <i>Antrodia xantha</i>                     | 3       |
| <i>Heterobasidion annosum</i>  | 4    | <i>Clavariadelphus sachalinensis</i>     | 1       | <i>Artomyces pyxidatus</i>                 | 1, 2, 3 |
| <i>Hymenochaete cruenta</i>    | 5    | <i>Dichomitus squalens</i>               | 1, 2    | <i>Athelia acrospora</i>                   | 3       |
| <i>Inonotus leporinus</i>      | 4    | <i>Exidiopsis calcea</i>                 | 2       | <i>Athelopsis subinconspicua</i>           | 3       |
| <i>Kuehneromyces mutabilis</i> | 5    | <i>Fibrodontia</i> cf. <i>subceracea</i> | 2       | <i>Auriscalpium vulgare</i>                | 1, 2    |
| <i>Phaeolus schweinitzii</i>   | 4    | <i>Fomitopsis cajanderi</i>              | 1, 5    | <i>Boletopsis grisea</i>                   | 1       |
| <i>Phellinus laricis</i>       | 5    | <i>Fomitopsis pinicola</i>               | 1, 2    | <i>Botryobasidium botryosum</i>            | 1, 3    |
| <i>Postia caesiosimulans</i>   | 5    | <i>Ganoderma applanatum</i>              | 2       | <i>Botryobasidium</i> cf. <i>candicans</i> | 3       |
| <i>Postia fragilis</i>         | 5    | <i>Globulicium hiemale</i>               | 2       | <i>Botryobasidium medium</i>               | 3       |
| <i>Postia lateritia</i>        | 5    | <i>Gloeophyllum protractum</i>           | 2       | <i>Botryobasidium</i> sp.                  | 3       |
| <i>Trichaptum abietinum</i>    | 4, 5 | <i>Gloeophyllum sepiarium</i>            | 1, 2    | <i>Botryobasidium subcoronatum</i>         | 2       |
| <i>Tubulicrinis sororius</i>   | 3    | <i>Hymenochaete laricis</i>              | 1       | <i>Byssomerulius albostramineus</i>        | 1       |
| <i>Xylodon radula</i>          | 5    | <i>Hyphoderma sibiricum</i>              | 2       | <i>Ceraceomyces microsporus</i>            | 1       |
|                                |      | <i>Irpicodon pendulus</i>                | 2       | <i>Ceriporia bresadolae</i>                | 2       |
|                                |      | <i>Laetiporus montanus</i>               | 2, 5    | <i>Chaetoderma luna</i>                    | 2       |
|                                |      | <i>Laetiporus sulphureus</i>             | 1, 3    | <i>Cinereomyces lindbladii</i>             | 3       |
|                                |      | <i>Laricifomes officinalis</i>           | 1, 2    | <i>Clavariadelphus ligula</i>              | 1, 2, 3 |
|                                |      | <i>Laurilia sulcata</i>                  | 1, 2, 3 | <i>Clavariadelphus sachalinensis</i>       | 1, 3    |
|                                |      | <i>Lentaria dendroidea</i>               | 3       | <i>Clavulinopsis luteoalba</i>             | 1       |
|                                |      | <i>Leptosporomyces fuscostratus</i>      | 2       | <i>Coltricia perennis</i>                  | 1       |
|                                |      | <i>Leucogyrophana romellii</i>           | 2       | <i>Coniophora arida</i>                    | 2, 3    |
|                                |      | <i>Litschauerella clematidis</i>         | 2       | <i>Coniophora olivacea</i>                 | 2       |
|                                |      | <i>Lyomyces erastii</i>                  | 2       | <i>Coniophora puteana</i>                  | 2       |
|                                |      | <i>Mucronella calva</i>                  | 2       | <i>Crustoderma corneum</i>                 | 1, 3    |
|                                |      | <i>Onnia tomentosa</i>                   | 5       | <i>Dacryobolus karstenii</i>               | 3       |

|  |                                      |         |                                   |            |
|--|--------------------------------------|---------|-----------------------------------|------------|
|  | <i>Osteina obducta</i>               | 1, 2    | <i>Dichomitus squalens</i>        | 3          |
|  | <i>Peniophora pithya</i>             | 1       | <i>Fibricium rude</i>             | 3          |
|  | <i>Peniophorella pallida</i>         | 2       | <i>Fomitopsis pinicola</i>        | 1, 2, 3, 4 |
|  | <i>Peniophorella praetermissa</i>    | 1       | <i>Fomitopsis rosea</i>           | 1          |
|  | <i>Phanerochaete sanguinea</i>       | 1       | <i>Gelatoporia subvermispota</i>  | 3          |
|  | <i>Phellinus abietis</i>             | 1, 2    | <i>Globulicium hiemale</i>        | 2, 3       |
|  | <i>Phellinus laricis</i>             | 5       | <i>Gloeophyllum protractum</i>    | 2          |
|  | <i>Phellinus ferrugineofuscus</i>    | 1, 2    | <i>Gloeophyllum sepiarium</i>     | 1, 2, 3    |
|  | <i>Phellinus nigrolimitatus</i>      | 2       | <i>Hydnellum aurantiacum</i>      | 1          |
|  | <i>Phlebiella sulphurea</i>          | 1       | <i>Hyphoderma crassescens</i>     | 3          |
|  | <i>Postia balsamea</i>               | 5       | <i>Hyphoderma occidentale</i>     | 1          |
|  | <i>Postia leucomallella</i>          | 1       | <i>Hyphoderma setigerum</i>       | 1, 3       |
|  | <i>Reptobasidium erikssonii</i>      | 1       | <i>Hyphoderma sibiricum</i>       | 1          |
|  | <i>Sistotrema brinkmannii</i>        | 2       | <i>Hyphodontia aspera</i>         | 3          |
|  | <i>Sistotremastrum guttuliferum</i>  | 2       | <i>Hyphodontia breviseta</i>      | 3          |
|  | <i>Sistotremella aff. perpusilla</i> | 2       | <i>Hyphodontia cf. spathulata</i> | 3          |
|  | <i>Steccherinum fimbriatum</i>       | 2       | <i>Hyphodontia crustosa</i>       | 3          |
|  | <i>Stereum sanguinolentum</i>        | 2       | <i>Hypochnicium punctulatum</i>   | 3          |
|  | <i>Trichaptum abietinum</i>          | 1, 2    | <i>Lentaria byssiseda</i>         | 2          |
|  | <i>Trichaptum fuscoviolaceum</i>     | 1, 2    | <i>Leptosporomyces galzinii</i>   | 1, 2, 3    |
|  | <i>Trichaptum laricinum</i>          | 1, 2, 3 | <i>Leptosporomyces mutabilis</i>  | 1          |
|  | <i>Tubulicrinis accedens</i>         | 2       | <i>Leucogyrophana mollusca</i>    | 3          |
|  | <i>Tubulicrinis calothrix</i>        | 2       | <i>Meruliopsis taxicola</i>       | 2          |
|  | <i>Tubulicrinis glebulosus</i>       | 2       | <i>Mucronella calva</i>           | 1          |
|  | <i>Tubulicrinis subulatus</i>        | 1       | <i>Oligoporus sericeomollis</i>   | 1          |
|  | <i>Tyromyces canadensis</i>          | 1       | <i>Peniophorella praetermissa</i> | 1, 3       |
|  | <i>Vararia investiens</i>            | 1       | <i>Phaeolus schweinitzii</i>      | 5          |
|  | <i>Xylodon asperus</i>               | 2       | <i>Phanerochaete sanguinea</i>    | 3          |
|  | <i>Xylodon borealis</i>              | 2       | <i>Phanerochaete sordida</i>      | 3          |
|  | <i>Xylodon crustosus</i>             | 2       | <i>Phellinus abietis</i>          | 3          |
|  | <i>Xylodon spathulatus</i>           | 2       | <i>Phellinus pini</i>             | 1, 2       |
|  |                                      |         | <i>Phlebia livida</i>             | 2          |
|  |                                      |         | <i>Phlebiella pseudotsugae</i>    | 3          |
|  |                                      |         | <i>Phlebiella sulphurea</i>       | 1          |
|  |                                      |         | <i>Piloderma byssinum</i>         | 3          |
|  |                                      |         | <i>Postia caesia</i>              | 2          |
|  |                                      |         | <i>Postia leucomallella</i>       | 1          |

|  |  |  |                                             |         |
|--|--|--|---------------------------------------------|---------|
|  |  |  | <i>Postia sericeomollis</i>                 | 3       |
|  |  |  | <i>Postia</i> sp. 1                         | 4       |
|  |  |  | <i>Pseudomerulius aureus</i>                | 1, 2    |
|  |  |  | <i>Ramaria abietina</i>                     | 1       |
|  |  |  | <i>Ramaria eumorpha</i>                     | 2, 3    |
|  |  |  | <i>Ramaria flaccida</i>                     | 3       |
|  |  |  | <i>Ramaria gracilis</i>                     | 1       |
|  |  |  | <i>Ramaria stricta</i>                      | 3       |
|  |  |  | <i>Ramaria suecica</i>                      | 3       |
|  |  |  | <i>Resinicium furfuraceum</i>               | 3       |
|  |  |  | <i>Sistotrema muscicola</i>                 | 2       |
|  |  |  | <i>Sistotrema octosporum</i>                | 1       |
|  |  |  | <i>Sistotremastrum suecicum</i>             | 1, 3    |
|  |  |  | <i>Sistotremella</i> aff. <i>perpusilla</i> | 1       |
|  |  |  | <i>Skeletocutis amorpha</i>                 | 3       |
|  |  |  | <i>Skeletocutis biguttulata</i>             | 1, 3    |
|  |  |  | <i>Skeletocutis carneogrisea</i>            | 2       |
|  |  |  | <i>Skeletocutis odora</i>                   | 1       |
|  |  |  | <i>Stereum sanguinolentum</i>               | 1       |
|  |  |  | <i>Thelephora terrestris</i>                | 1, 3    |
|  |  |  | <i>Tomentella atramentaria</i>              | 3       |
|  |  |  | <i>Tomentella fuscocinerea</i>              | 3       |
|  |  |  | <i>Tomentella radiosa</i>                   | 1       |
|  |  |  | <i>Tomentellopsis echinospora</i>           | 1       |
|  |  |  | <i>Trechispora farinacea</i>                | 1       |
|  |  |  | <i>Trichaptum abietinum</i>                 | 1, 3, 4 |
|  |  |  | <i>Trichaptum fuscoviolaceum</i>            | 1, 3    |
|  |  |  | <i>Tubulicrinis angustus</i>                | 1       |
|  |  |  | <i>Tubulicrinis borealis</i>                | 2, 3    |
|  |  |  | <i>Tubulicrinis calothrix</i>               | 2, 3    |
|  |  |  | <i>Tubulicrinis chaetophorus</i>            | 3       |
|  |  |  | <i>Tubulicrinis confusus</i>                | 1       |
|  |  |  | <i>Tubulicrinis glebulosus</i>              | 3       |
|  |  |  | <i>Tubulicrinis medius</i>                  | 1, 3    |
|  |  |  | <i>Tubulicrinis propinguus</i>              | 1       |
|  |  |  | <i>Tubulicrinis sororius</i>                | 1       |
|  |  |  | <i>Tubulicrinis strangulatus</i>            | 3       |

|                                      |               |                                          |         | <i>Tubulicrinis subulatus</i>         | 2, 3          |
|--------------------------------------|---------------|------------------------------------------|---------|---------------------------------------|---------------|
|                                      |               |                                          |         | <i>Tylospora asterophora</i>          | 3             |
|                                      |               |                                          |         | <i>Xylodon crustosus</i>              | 2             |
|                                      |               |                                          |         | <i>Xylodon rimosissimus</i>           | 1             |
|                                      |               |                                          |         | <i>Xylodon spathulatus</i>            | 1             |
| <b>Angiosperm</b>                    |               |                                          |         |                                       |               |
| <i>Betula</i> spp.                   | Site          | <i>Populus</i> spp.                      | Site    | <i>Salix</i> spp.                     | Site          |
| <i>Antrodia malicola</i>             | 2             | <i>Bjerkandera adusta</i>                | 1, 2, 3 | <i>Amphinema byssoides</i>            | 2             |
| <i>Antrodiella pallescens</i>        | 1             | <i>Botryobasidium isabellinum</i>        | 2       | <i>Antrodia hyalina</i>               | 2             |
| <i>Athelia decipiens</i>             | 3             | <i>Botryodontia millavensis</i>          | 2       | <i>Antrodia minuta</i>                | 2             |
| <i>Basidioidendron eyrei</i>         | 1             | <i>Cerrena unicolor</i>                  | 2       | <i>Antrodia sinuosa</i>               | 1             |
| <i>Bjerkandera adusta</i>            | 1, 2, 3       | <i>Corticium roseum</i>                  | 1, 2, 3 | <i>Antrodia xantha</i>                | 3             |
| <i>Botryobasidium botryoideum</i>    | 3             | <i>Cytidia salicina</i>                  | 2       | <i>Bjerkandera adusta</i>             | 1, 2          |
| <i>Botryobasidium subcoronatum</i>   | 4             | <i>Fibrodontia</i> cf. <i>subceracea</i> | 2       | <i>Ceraceomyces serpens</i>           | 3             |
| <i>Ceraceomyces serpens</i>          | 1             | <i>Fomes fomentarius</i>                 | 1, 2    | <i>Ceriporia purpurea</i>             | 2             |
| <i>Ceraceomyces tessulatus</i>       | 1             | <i>Funalia trogii</i>                    | 2       | <i>Ceriporia viridans</i>             | 2             |
| <i>Cerrena unicolor</i>              | 1, 2, 3, 4    | <i>Ganoderma applanatum</i>              | 2, 4, 5 | <i>Ceriporiopsis pseudogilvescens</i> | 1             |
| <i>Chondrostereum purpureum</i>      | 1, 2          | <i>Gelatoporia pannocincta</i>           | 2       | <i>Cerrena unicolor</i>               | 1, 2          |
| <i>Climacodon pulcherrimus</i>       | 5             | <i>Gloeophyllum trabeum</i>              | 2       | <i>Chondrostereum purpureum</i>       | 1, 3          |
| <i>Corticium polygonioides</i>       | 3             | <i>Gloeoporus dichrous</i>               | 2       | <i>Corticium polygonioides</i>        | 3             |
| <i>Cylindrobasidium evolvens</i>     | 3             | <i>Hericium coralloides</i>              | 3       | <i>Corticium roseum</i>               | 1, 3          |
| <i>Cylindrobasidium torrendii</i>    | 2             | <i>Hyphoderma mutatum</i>                | 1       | <i>Cylindrobasidium evolvens</i>      | 1             |
| <i>Daedaleopsis tricolor</i>         | 1, 2, 3, 4, 5 | <i>Hyphodermella rosae</i>               | 2       | <i>Cytidia salicina</i>               | 1, 2, 3       |
| <i>Datronia mollis</i>               | 1, 2          | <i>Hypsizygus marmoreus</i>              | 5       | <i>Daedaleopsis confragosa</i>        | 1, 2, 3       |
| <i>Fibricium rude</i>                | 3             | <i>Inonotus rheades</i>                  | 2, 3    | <i>Datronia mollis</i>                | 1, 2          |
| <i>Fomes fomentarius</i>             | 1, 2, 3, 4, 5 | <i>Irpex lacteus</i>                     | 2       | <i>Dendrothele commixta</i>           | 2             |
| <i>Fomitopsis pinicola</i>           | 1, 2, 3, 4, 5 | <i>Kneiffiella barba-jovis</i>           | 1       | <i>Fomes fomentarius</i>              | 2             |
| <i>Ganoderma applanatum</i>          | 1, 2          | <i>Lentaria surculus</i>                 | 2       | <i>Fomitiporia punctata</i>           | 1, 2, 3, 4, 5 |
| <i>Gloeopeniophorella convolvens</i> | 1, 4, 5       | <i>Lyomyces sambuci</i>                  | 2       | <i>Funalia trogii</i>                 | 2             |
| <i>Gloeoporus dichrous</i>           | 2, 5          | <i>Monilicystidium ochraceum</i>         | 2       | <i>Ganoderma applanatum</i>           | 1, 2          |
| <i>Gloeoporus pannocinctus</i>       | 1             | <i>Peniophora laurentii</i>              | 1       | <i>Gloeoporus dichrous</i>            | 2             |
| <i>Gyrophanopsis polonensis</i>      | 2             | <i>Peniophora nuda</i>                   | 1       | <i>Hapalopilus rutilans</i>           | 2             |
| <i>Hapalopilus rutilans</i>          | 1, 2, 3       | <i>Peniophora rufa</i>                   | 3       | <i>Haploporus odor</i>                | 1, 2, 3       |
| <i>Hericium coralloides</i>          | 1, 2, 5       | <i>Phanerochaete</i> aff. <i>globosa</i> | 2       | <i>Hymenochaete tabacina</i>          | 1, 2          |

|                                  |               |                                     |         |                                     |         |
|----------------------------------|---------------|-------------------------------------|---------|-------------------------------------|---------|
| <i>Hyphoderma argillaceum</i>    | 1             | <i>Phanerochaete sordida</i>        | 2       | <i>Hyphoderma occidentale</i>       | 1       |
| <i>Hyphoderma mutatum</i>        | 1             | <i>Phanerochaete velutina</i>       | 3       | <i>Hyphoderma setigerum</i>         | 2       |
| <i>Hyphoderma setigerum</i>      | 3             | <i>Phellinus tremulae</i>           | 1, 2, 3 | <i>Hypochnicium bombycinum</i>      | 1, 3    |
| <i>Hyphodontia barba-jovis</i>   | 3             | <i>Phlebia aff. Albofibrillosa</i>  | 2       | <i>Inonotus radiatus</i>            | 2       |
| <i>Inonotus obliquus</i>         | 1, 2, 3, 4, 5 | <i>Phlebia setulosa</i>             | 2       | <i>Intextomyces contiguus</i>       | 2, 3    |
| <i>Irpex lacteus</i>             | 1, 2, 4, 5    | <i>Polyporus badius</i>             | 2       | <i>Irpex lacteus</i>                | 2, 3, 4 |
| <i>Laxitextum bicolor</i>        | 2             | <i>Polyporus leptcephalus</i>       | 2       | <i>Ischnoderma cf. resinosum</i>    | 2       |
| <i>Mucronella bresadolae</i>     | 1             | <i>Polyporus pseudobetulinus</i>    | 1       | <i>Megalocystidium leucoxanthum</i> | 2       |
| <i>Mycoacia fuscoatra</i>        | 1, 3          | <i>Rigidoporus corticola</i>        | 2       | <i>Peniophora cinerea</i>           | 2       |
| <i>Neolentinus lepideus</i>      | 5             | <i>Schizophyllum amplum</i>         | 2       | <i>Phellinus conchatus</i>          | 2       |
| <i>Peniophora incarnata</i>      | 1             | <i>Schizophyllum commune</i>        | 2       | <i>Phellinus igniarius</i>          | 2, 5    |
| <i>Peniophora manshurica</i>     | 2             | <i>Scopuloides rimosa</i>           | 2       | <i>Phlebia nitidula</i>             | 1, 2, 3 |
| <i>Peniophora violaceolivida</i> | 1             | <i>Sistotrema diademiferum</i>      | 1       | <i>Polyporus leptcephalus</i>       | 2       |
| <i>Phanerochaete magnoliae</i>   | 2             | <i>Spongipellis spumea</i>          | 2       | <i>Polyporus melanopus</i>          | 2       |
| <i>Phanerochaete sordida</i>     | 2, 3          | <i>Subulicystidium brachysporum</i> | 2       | <i>Polyporus pseudobetulinus</i>    | 2       |
| <i>Phanerochaete velutina</i>    | 1             | <i>Subulicystidium longisporum</i>  | 2       | <i>Porostereum spadiceum</i>        | 2       |
| <i>Phellinus cinereus</i>        | 1, 2, 3, 5    | <i>Trametes gibbosa</i>             | 2       | <i>Schizophyllum commune</i>        | 2, 3    |
| <i>Phellinus laevigatus</i>      | 2, 3, 4, 5    | <i>Trametes hirsuta</i>             | 3       | <i>Scopuloides rimosa</i>           | 2       |
| <i>Phlebia radiata</i>           | 1             | <i>Trametes ljubarskyi</i>          | 2       | <i>Sistotrema oblongisporum</i>     | 1       |
| <i>Phlebia setulosa</i>          | 2             | <i>Trametes ochracea</i>            | 1, 2    | <i>Sistotrema octosporum</i>        | 2       |
| <i>Phlebia tremellosa</i>        | 4, 5          | <i>Trametes versicolor</i>          | 1       | <i>Steccherinum ochraceum</i>       | 1, 2    |
| <i>Phellinus lundellii</i>       | 1, 2, 4, 5    | <i>Trametes warnieri</i>            | 2       | <i>Stereum hirsutum</i>             | 3       |
| <i>Piptoporus betulinus</i>      | 1, 2, 3, 4, 5 | <i>Tubulicrinis glebulosus</i>      | 1       | <i>Stereum rugosum</i>              | 2       |
| <i>Pleurotus pulmonarius</i>     | 4, 5          | <i>Typhula erythropus</i>           | 1, 2    | <i>Trametes hirsuta</i>             | 1, 2    |
| <i>Plicaturopsis crispa</i>      | 2, 5          | <i>Xylodon rimosissimus</i>         | 2       | <i>Trametes ljubarskyi</i>          | 2       |
| <i>Polyporus brumalis</i>        | 1             |                                     |         | <i>Trametes ochracea</i>            | 1       |
| <i>Polyporus leptcephalus</i>    | 1             |                                     |         | <i>Trametes pubescens</i>           | 1, 2    |
| <i>Pseudotomentella nigra</i>    | 1             |                                     |         | <i>Trametes suaveolens</i>          | 1, 3    |
| <i>Pycnoporus cinnabarinus</i>   | 2             |                                     |         | <i>Trametes versicolor</i>          | 2       |
| <i>Rigidoporus crocatus</i>      | 1             |                                     |         | <i>Trechispora nivea</i>            | 2       |
| <i>Schizophyllum commune</i>     | 2             |                                     |         | <i>Trechispora farinacea</i>        | 2       |
| <i>Scopuloides rimosa</i>        | 1             |                                     |         | <i>Typhula culmigena</i>            | 3       |
| <i>Scytinostroma galactinum</i>  | 1, 3          |                                     |         | <i>Typhula erythropus</i>           | 3       |
| <i>Seccherinum fimbriatum</i>    | 1             |                                     |         | <i>Typhula setipes</i>              | 1, 2, 3 |

|                                    |            |  |  |                           |      |
|------------------------------------|------------|--|--|---------------------------|------|
| <i>Sistotrema brinkmannii</i>      | 1, 2       |  |  | <i>Typhula spathulata</i> | 2, 3 |
| <i>Steccherinum ochraceum</i>      | 1, 3       |  |  | <i>Tyromyces chioneus</i> | 2    |
| <i>Stereum hirsutum</i>            | 1, 2, 4, 5 |  |  | <i>Xylodon crustosus</i>  | 2    |
| <i>Stereum subtomentosum</i>       | 2, 4, 5    |  |  | <i>Xylodon</i> sp.        | 2    |
| <i>Subulicystidium longisporum</i> | 1          |  |  |                           |      |
| <i>Trametes betulina</i>           | 2          |  |  |                           |      |
| <i>Trametes cervina</i>            | 2          |  |  |                           |      |
| <i>Trametes gibbosa</i>            | 2          |  |  |                           |      |
| <i>Trametes hirsuta</i>            | 2, 5       |  |  |                           |      |
| <i>Trametes pubescens</i>          | 1, 2, 5    |  |  |                           |      |
| <i>Trametes velutina</i>           | 1, 2       |  |  |                           |      |
| <i>Trametes versicolor</i>         | 1, 3, 4, 5 |  |  |                           |      |
| <i>Trechispora mollusca</i>        | 2, 3       |  |  |                           |      |
| <i>Trichaptum biforme</i>          | 4, 5       |  |  |                           |      |
| <i>Trichaptum pargamenum</i>       | 1, 2, 3    |  |  |                           |      |
| <i>Tubulicrinis glebulosus</i>     | 1          |  |  |                           |      |
| <i>Tyromyces chioneus</i>          | 1, 2, 3    |  |  |                           |      |
| <i>Vararia investiens</i>          | 2          |  |  |                           |      |
| <i>Xylodon crustosus</i>           | 1          |  |  |                           |      |
| <i>Xylodon flaviporus</i>          | 2, 5       |  |  |                           |      |
| <i>Xylodon paradoxus</i>           | 2          |  |  |                           |      |

\*Site

- 1: **Central Siberia** [Kotiranta H, Shiryayev AG. Aphylophoroid fungi (Basidiomycota) in Tunguska River basin, central East Siberia, Russia. Karstenia. 2016;55:25–42]
- 2: **Tuva Republic** [Kotiranta H, Shiryayev AG, Spirin V. Aphylophoroid fungi (Basidiomycota) of Tuva Republic, Southern Siberia, Russia. Folia Cryptog Estonica Fasc. 2016;53:51–64]
- 3: **Yenisei River basin** [Shiryayev AG, Kotiranta H. Aphylophoroid fungi (Basidiomycota) of the middle part of Yenisei River basin, East Siberia, Russia. Karstenia. 2016;55:43–60]
- 4: **Krasnoyarsk, Central Siberia** [this study]
- 5: **Republic of Khakassia** [this study]
